# Supplementary material for: What is the effectiveness of obesity related interventions at retail grocery stores and supermarkets? —a systematic review
Source: BMC Public Health. 2016 Dec 28;16:1247. doi: 10.1186/s12889-016-3985-x (PMC5192566; doi:10.1186/s12889-016-3985-x)
Supplement: Additional file 2: Appendix 2. — Summary of methodological quality scores. Contains a table showing the methodological assessment scores for the reviewed studies. (DOCX 93 kb) [file 12889_2016_3985_MOESM2_ESM.docx]

Appendix 2: Summary of methodological quality scores

| Score (0-3) | | | | | | | | | | | | |
| --- | --- | --- | --- | --- | --- | --- | --- | --- | --- | --- | --- | --- |
| Criteria | Waterlander et al.([26](#_ENREF_26)) | Bihan et al.([57](#_ENREF_57)) | Mhurchu et al.([60](#_ENREF_60)) | Mhurchu et al.([61](#_ENREF_61)) | Blakely et al.([59](#_ENREF_59)) | Kennedy et al.([50](#_ENREF_50)) | Ayala et al.([66](#_ENREF_66)) | Dannefer et al.([72](#_ENREF_72)) | Steenhuis et al.([63](#_ENREF_63)) | Steenhuis et al.([62](#_ENREF_62)) | An et al.([23](#_ENREF_23)) | Song et al.([83](#_ENREF_83)) | Sigurdsson et al.([58](#_ENREF_58)) |
| Explicit theoretical framework | 3 | 2 | 2 | 1 | 2 | 1 | 1 | 2 | 3 | 2 | 1 | 3 | 1 |
| Statement of aims/objectives in main body of report | 3 | 3 | 3 | 3 | 3 | 3 | 3 | 3 | 3 | 3 | 3 | 3 | 3 |
| Clear description of research setting | 3 | 3 | 3 | 3 | 3 | 3 | 3 | 3 | 3 | 3 | 3 | 3 | 3 |
| Evidence of sample size considered in terms of analysis | 3 | 3 | 3 | 1 | 1 | 0 | 3 | 0 | 0 | 0 | 0 | 0 | 0 |
| Representative sample of target group of a reasonable size | 1 | 2 | 3 | 1 | 3 | 1 | 2 | 2 | 3 | 2 | 3 | 1 | 1 |
| Description of procedure for data collection | 3 | 3 | 3 | 3 | 3 | 3 | 3 | 3 | 3 | 3 | 3 | 2 | 3 |
| Rationale for choice of data collection tool(s) | 3 | 3 | 3 | 3 | 3 | 2 | 2 | 1 | 3 | 2 | 3 | 2 | 1 |
| Detailed recruitment data | 2 | 2 | 3 | 3 | 3 | 2 | 3 | 1 | 3 | 3 | 3 | 2 | 1 |
| Statistical assessment of reliability and validity of measurement tool(s)  (Quantitative only) | 2 | 1 | 2 | 2 | 0 | 2 | 0 | 0 | 2 | - | 3 | - | 0 |
| Fit between stated research question and method of data collection  (Quantitative only) | 3 | 3 | 3 | 3 | 3 | 3 | 3 | 2 | 3 | - | 2 | - | 2 |
| Fit between stated research question and format and content of data collection tool e.g. interview schedule  (Qualitative only) | - | - | - | - | - | 3 | 3 | - | 3 | 3 | - | 2 | - |
| Fit between research question and method of analysis  (Quantitative only) | 3 | 3 | 3 | 1 | 3 | 2 | 2 | 2 | 2 | - | 3 | - | 2 |
| Good justification for analytic method selected | 3 | 2 | 2 | 1 | 1 | 0 | 2 | 1 | 3 | 0 | 3 | 1 | 0 |
| Assessment of reliability of analytic process  (Qualitative only) | - | - | - | - | - | 2 | 1 | - | 3 | 0 | - | 0 | - |
| Evidence of user involvement in design | 1 | 1 | 3 | 0 | 3 | 0 | 0 | 0 | 3 | 3 | 0 | 1 | 3 |
| Strengths and limitations critically discussed | 2 | 3 | 3 | 3 | 3 | 0 | 3 | 2 | 3 | 0 | 3 | 3 | 0 |
| Score total/maximum score possible | 35/42 | 34/42 | 39/42 | 28/42 | 34/42 | 27/48 | 34/48 | 22/42 | 43/48 | 24/42 | 33/42 | 23/42 | 20/42 |

| Score (0-3) | | | | | | | | | | | | |
| --- | --- | --- | --- | --- | --- | --- | --- | --- | --- | --- | --- | --- |
| Criteria | Sutherland et al.([77](#_ENREF_77)) | Herman et al.([29](#_ENREF_29)) | Herman et al.([28](#_ENREF_28)) | Geliebter et al.([24](#_ENREF_24)) | Cummins et al.([55](#_ENREF_55)) | Colapinto and Malaviarachchi([52](#_ENREF_52)) | Milliron et al.([81](#_ENREF_81)) | Rosecrans et al.([54](#_ENREF_54)) | Novotny et al.([82](#_ENREF_82)) | Gittelsohn et al.([65](#_ENREF_65)) | Gittelsohn et al.([97](#_ENREF_97)) | Gittelsohn et al.([74](#_ENREF_74)) | Foster et al.([73](#_ENREF_73)) |
| Explicit theoretical framework | 2 | 2 | 2 | 3 | 1 | 1 | 1 | 2 | 3 | 3 | 3 | 3 | 2 |
| Statement of aims/objectives in main body of report | 3 | 3 | 3 | 3 | 3 | 3 | 3 | 3 | 3 | 2 | 3 | 3 | 3 |
| Clear description of research setting | 3 | 3 | 3 | 2 | 3 | 3 | 3 | 3 | 3 | 3 | 3 | 3 | 3 |
| Evidence of sample size considered in terms of analysis | 0 | 0 | 1 | 3 | 1 | 3 | 3 | 0 | 0 | 0 | 0 | 0 | 0 |
| Representative sample of target group of a reasonable size | 3 | 2 | 2 | 2 | 2 | 2 | 1 | 1 | 2 | 2 | 1 | 1 | 1 |
| Description of procedure for data collection | 3 | 3 | 3 | 3 | 3 | 3 | 3 | 3 | 3 | 3 | 3 | 3 | 3 |
| Rationale for choice of data collection tool(s) | 3 | 3 | 3 | 3 | 2 | 1 | 3 | 2 | 2 | 2 | 2 | 2 | 3 |
| Detailed recruitment data | 0 | 2 | 3 | 3 | 3 | 2 | 3 | 1 | 2 | 1 | 1 | 2 | 2 |
| Statistical assessment of reliability and validity of measurement tool(s)  (Quantitative only) | 1 | 0 | 3 | 3 | 2 | 0 | 3 | 0 | 0 | 0 | 0 | 0 | 1 |
| Fit between stated research question and method of data collection  (Quantitative only) | 1 | 2 | 2 | 3 | 2 | 1 | 2 | 2 | 2 | 1 | 2 | 2 | 3 |
| Fit between stated research question and format and content of data collection tool e.g. interview schedule  (Qualitative only) | - | 1 | 1 | - | - | - | - | 3 | 2 | 2 | - | 2 | - |
| Fit between research question and method of analysis  (Quantitative only) | 1 | 1 | 2 | 3 | 2 | 1 | 3 | 2 | 2 | 2 | 2 | 3 | 3 |
| Good justification for analytic method selected | 2 | 0 | 2 | 1 | 3 | 0 | 3 | 2 | 0 | 0 | 2 | 2 | 2 |
| Assessment of reliability of analytic process  (Qualitative only) | - | 1 | 1 | - | - | - | - | 1 | 1 | 1 | - | 1 | - |
| Evidence of user involvement in design |  | 0 | 0 | 0 | 1 | 1 | 1 | 2 | 2 | 2 | 1 | 2 | 3 |
| Strengths and limitations critically discussed | 2 | 1 | 3 | 3 | 3 | 2 | 3 | 2 | 1 | 3 | 3 | 3 | 3 |
| Score total/maximum score possible | 24/42 | 24/48 | 34/48 | 35/42 | 31/42 | 23/42 | 35/42 | 29/48 | 28/48 | 27/48 | 26/42 | 32/48 | 32/42 |

| Score (0-3) | | | | | | | | | | | | |
| --- | --- | --- | --- | --- | --- | --- | --- | --- | --- | --- | --- | --- |
| Criteria | Freedman and Connors([69](#_ENREF_69)) | Ogawa et al.([56](#_ENREF_56)) | Holmes et al.([80](#_ENREF_80)) | Freedman et al.([68](#_ENREF_68)) | Andrejeva et al.([70](#_ENREF_70)) | Caldwell et al.([67](#_ENREF_67)) | Song et al.([76](#_ENREF_76)) | Ho et al.([53](#_ENREF_53)) | Bains et al.([51](#_ENREF_51)) | Gittelsohn et al.([75](#_ENREF_75)) | Gittelsohn et al.([78](#_ENREF_78)) | Curran et al.([71](#_ENREF_71)) | Phipps et al.([25](#_ENREF_25)) |
| Explicit theoretical framework | 1 | 1 | 2 | 1 | 1 | 2 | 2 | 2 | 2 | 1 | 2 | 3 | 1 |
| Statement of aims/objectives in main body of report | 3 | 2 | 3 | 3 | 3 | 3 | 3 | 3 | 3 | 3 | 2 | 3 | 3 |
| Clear description of research setting | 3 | 3 | 3 | 3 | 3 | 3 | 3 | 3 | 3 | 3 | 3 | 3 | 3 |
| Evidence of sample size considered in terms of analysis | 0 | 0 | 0 | 0 | 2 | 1 | 0 | 0 | 0 | 3 | 0 | 0 | 0 |
| Representative sample of target group of a reasonable size | 2 | 1 | 1 | 2 | 2 | 2 | 2 | 1 | 1 | 1 | 1 | 1 | 1 |
| Description of procedure for data collection | 2 | 3 | 3 | 3 | 3 | 3 | 3 | 3 | 3 | 3 | 3 | 2 | 3 |
| Rationale for choice of data collection tool(s) | 0 | 1 | 2 | 1 | 3 | 2 | 2 | 2 | 2 | 2 | 1 | 2 | 2 |
| Detailed recruitment data | 0 | 0 | 0 | 2 | 0 | 2 | 2 | 0 | 3 | 2 | 2 | 1 | 3 |
| Statistical assessment of reliability and validity of measurement tool(s)  (Quantitative only) | 1 | 1 | 2 | 1 | 3 | 1 | 0 | 0 | 1 | 0 | 0 | 0 | 0 |
| Fit between stated research question and method of data collection  (Quantitative only) | 1 | 1 | 1 | 2 | 2 | 2 | 1 | 2 | 1 | 2 | 2 | 1 | 1 |
| Fit between stated research question and format and content of data collection tool e.g. interview schedule  (Qualitative only) | - | - | 2 | 3 | - | - | 3 | 2 | - | 2 | 2 | - | 2 |
| Fit between research question and method of analysis  (Quantitative only) | 2 | 2 | 2 | 3 | 3 | 2 | 2 | 2 | 2 | 3 | 3 | 2 | 2 |
| Good justification for analytic method selected | 0 | 0 | 0 | 2 | 2 | 1 | 0 | 1 | 1 | 0 | 1 | 1 | 2 |
| Assessment of reliability of analytic process  (Qualitative only) | - | - | 2 | 0 | - | - | 2 | 1 | - | 2 | 0 | - | 0 |
| Evidence of user involvement in design | 0 | 0 | 2 | 2 | 0 | 0 | 1 | 0 | 3 | 3 | 3 | 1 | 2 |
| Strengths and limitations critically discussed | 3 | 3 | 0 | 3 | 3 | 2 | 3 | 2 | 2 | 2 | 3 | 2 | 2 |
| Score total/maximum score possible | 18/42 | 18/42 | 25/48 | 31/48 | 30/42 | 26/42 | 29/48 | 24/48 | 27/42 | 32/48 | 28/48 | 22/42 | 27/48 |

|  | Score (0-3) | | | | | | | | | | | | |
| --- | --- | --- | --- | --- | --- | --- | --- | --- | --- | --- | --- | --- | --- |
| Criteria | Salmon et al., 2015([64](#_ENREF_64)) | Ball et al., 2015([27](#_ENREF_27)) | Martínez-Donate et al., 2015([79](#_ENREF_79)) |  |  |  |  |  |  |  |  |  |  |
| Explicit theoretical framework | 2 | 1 | 3 |  |  |  |  |  |  |  |  |  |  |
| Statement of aims/objectives in main body of report | 3 | 3 | 3 |  |  |  |  |  |  |  |  |  |  |
| Clear description of research setting | 3 | 3 | 3 |  |  |  |  |  |  |  |  |  |  |
| Evidence of sample size considered in terms of analysis | 2 | 3 | 1 |  |  |  |  |  |  |  |  |  |  |
| Representative sample of target group of a reasonable size | 2 | 3 | 1 |  |  |  |  |  |  |  |  |  |  |
| Description of procedure for data collection | 3 | 3 | 3 |  |  |  |  |  |  |  |  |  |  |
| Rationale for choice of data collection tool(s) | 3 | 3 | 1 |  |  |  |  |  |  |  |  |  |  |
| Detailed recruitment data | 3 | 3 | 3 |  |  |  |  |  |  |  |  |  |  |
| Statistical assessment of reliability and validity of measurement tool(s)  (Quantitative only) | 0 | 3 | 1 |  |  |  |  |  |  |  |  |  |  |
| Fit between stated research question and method of data collection  (Quantitative only) | 3 | 3 | 2 |  |  |  |  |  |  |  |  |  |  |
| Fit between stated research question and format and content of data collection tool e.g. interview schedule  (Qualitative only) | - | - | 2 |  |  |  |  |  |  |  |  |  |  |
| Fit between research question and method of analysis  (Quantitative only) | 3 | 3 | 2 |  |  |  |  |  |  |  |  |  |  |
| Good justification for analytic method selected | 1 | 2 | 1 |  |  |  |  |  |  |  |  |  |  |
| Assessment of reliability of analytic process  (Qualitative only) | - | - | 0 |  |  |  |  |  |  |  |  |  |  |
| Evidence of user involvement in design | 0 | 2 | 1 |  |  |  |  |  |  |  |  |  |  |
| Strengths and limitations critically discussed | 1 | 3 | 2 |  |  |  |  |  |  |  |  |  |  |
| Score total/maximum score possible | 29/42 | 38/42 | 29/48 |  |  |  |  |  |  |  |  |  |  |
